# FREE Online Subscription to *Psychiatric Services* for APA Resident-Fellow Members (RFMs)!

American Psychiatric Association Resident-Fellow Members (RFMs) can receive a free online subscription to *Psychiatric Services*.

Simply visit [ps.psychiatryonline.org](http://ps.psychiatryonline.org) for full-text access to all of the content of APA's highly ranked, peer-reviewed monthly journal. *Psychiatric Services* focuses on service delivery in organized systems of care, evolving best practices, and federal and state policies that affect the care of people with mental illnesses.

Please visit [ps.psychiatryonline.org](http://ps.psychiatryonline.org) and log in with your American Psychiatric Association username and password.

Psychiatry residents who are not currently APA Resident-Fellow Members should consider membership in the American Psychiatric Association. The benefits provided to residents are an example of how the APA serves the needs of its members throughout their careers. The low introductory dues APA extends to RFMs are even waived for the first year. Please visit [www.psychiatry.org/joinapa](http://www.psychiatry.org/joinapa) for more information.

[ps.psychiatryonline.org](http://ps.psychiatryonline.org)

AMERICAN  
PSYCHIATRIC  
ASSOCIATION  
PUBLISHING

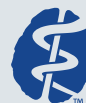

[www.appi.org](http://www.appi.org)  
Email: [appi@psych.org](mailto:appi@psych.org)  
Toll-Free: 1-800-368-5777

AH1507A

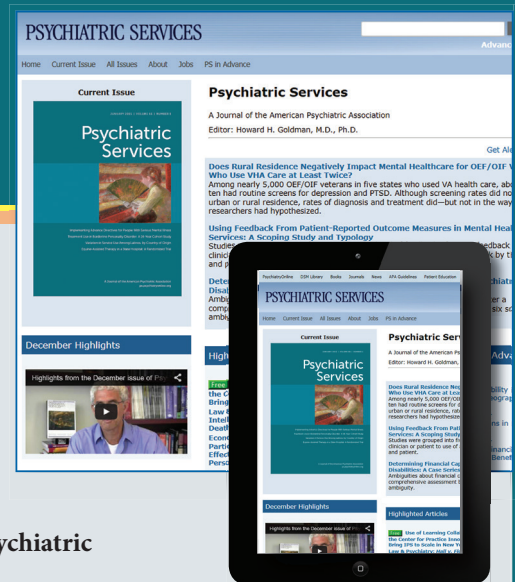

***Psychiatric Services*** (ISSN 1075-2730; online version, 1557-9700) is published monthly by the American Psychiatric Association, editorial and executive office, 1000 Wilson Blvd., Suite 1825, Arlington, VA 22209-3901. Copyright © 2016 by the American Psychiatric Association. Printed in U.S.A. Periodicals postage paid at Arlington, VA, and at additional mailing offices. POSTMASTER: Send address changes to ***Psychiatric Services***, 1000 Wilson Blvd., Suite 1825, Arlington, VA 22209-3901.

## The American Psychiatric Publishing Textbook of Geriatric Psychiatry, Fifth Edition

Edited by David C. Steffens, M.D., M.H.S.,  
Dan G. Blazer, M.D., Ph.D., and Mugdha E. Thakur, M.D.

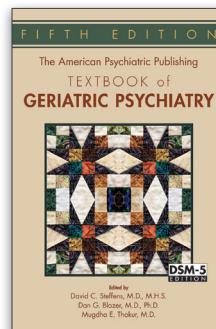

Widely recognized as the standard in its field, *The American Psychiatric Publishing Textbook of Geriatric Psychiatry* serves a critical need for clinicians challenged to meet the mental health needs of an aging population.

Building on the prodigious strengths of previous editions, this revision is the most current, comprehensive, and systematic textbook of geriatric psychiatry available today, and the only one that is DSM-5® concordant.

2015 • 837 pages • ISBN 978-1-58562-484-3 • Hardcover  
\$182.00 • Item #62484

AMERICAN  
PSYCHIATRIC  
ASSOCIATION  
PUBLISHING

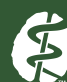

[www.appi.org](http://www.appi.org)  
Email: [appi@psych.org](mailto:appi@psych.org)  
Phone: 1-800-368-5777

20% Discount for  
American Psychiatric  
Association Members!  
25% Discount for  
APA Resident-Fellow  
Members!

AH1532JRL

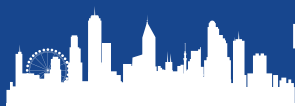

AMERICAN  
PSYCHIATRIC  
ASSOCIATION

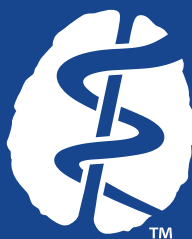

## ANNUAL MEETING

May 14-18, 2016 • Atlanta

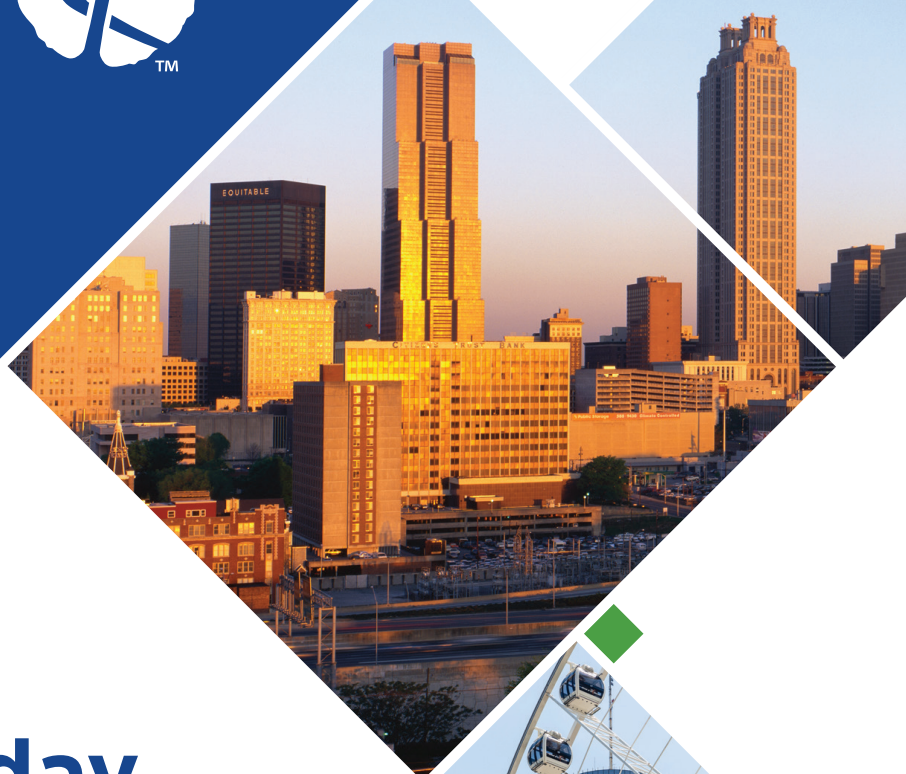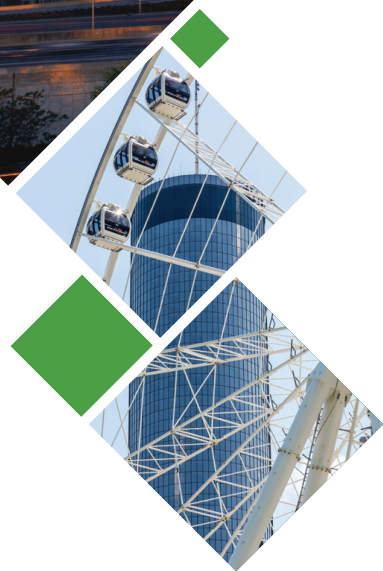

# Register Today

[psychiatry.org/annualmeeting](http://psychiatry.org/annualmeeting)

- Discover cutting-edge science and new therapies.
- Learn from renowned leaders in psychiatry and health policy.
- Connect with your peers and expand your professional network.
- Earn your annual licensure CME credit at one meeting.
- Explore the Exhibit Hall, APA Publishing Bookstore and Publishers' Book Fair.

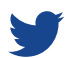

Join the conversation: **#APAAM2016**
