MARCH 2016 | VOLUME 67 | NUMBER 3

# Psychiatric Services

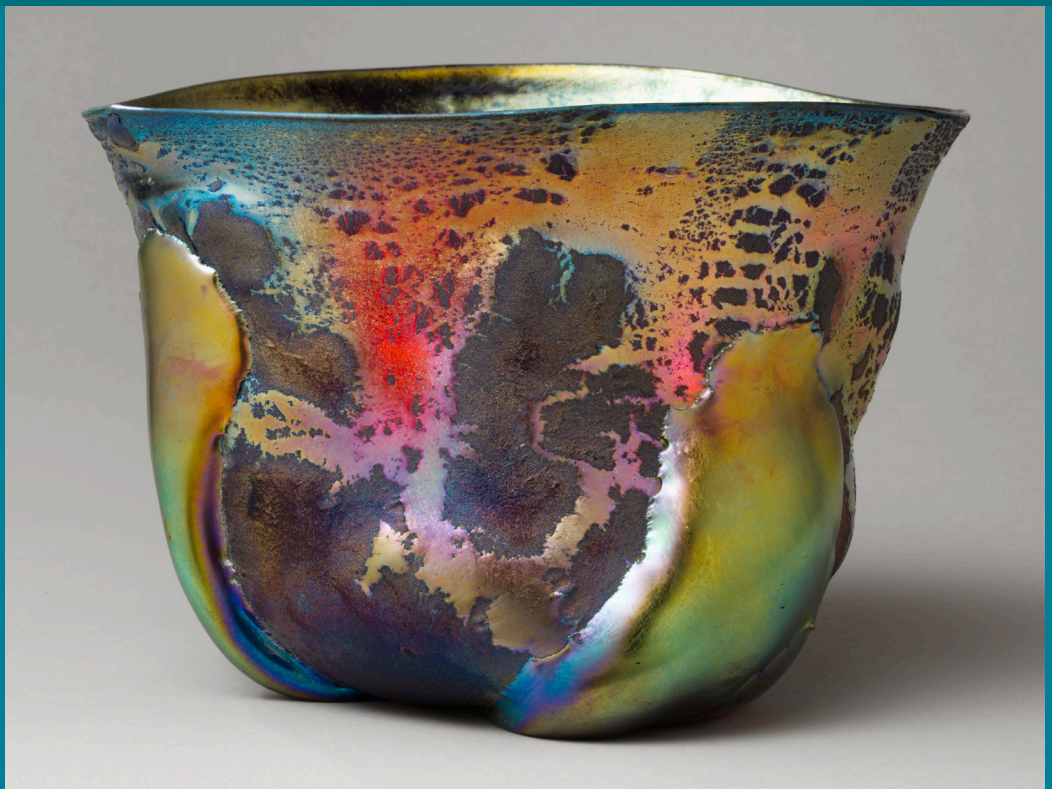

Use of services by immigrants in the United States: a literature review  
Housing First with ACT in five Canadian cities: two-year outcomes  
Focus on psychiatric treatment of children and adolescents: six reports  
Mental illness and the care experience: satisfaction with plans and providers
