# Essential New Titles on Addiction Psychiatry

NEW!

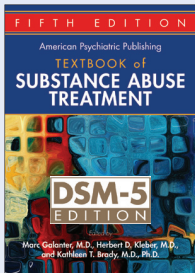

## The American Psychiatric Publishing Textbook of Substance Abuse Treatment

Edited by Marc Galanter, M.D., Herbert D. Kleber, M.D., and Kathleen T. Brady, M.D., Ph.D.

No other text available today offers what *The American Psychiatric Publishing Textbook of Substance Abuse Treatment* can: completely updated treatment information on a broad range of substance use disorders that is consistent with the new DSM-5 classification and thus reflective of how psychiatry is practiced today. Designed for researchers and mental health professionals ranging from trainee to licensed practitioner, the book is also appropriate for a diverse array of rehabilitation settings, from inpatient to community-based treatment. Full coverage is provided on 12-step programs, as well, including the latest outcomes research.

2015 • 925 pages • ISBN 978-1-58562-472-0 • Hardcover • \$204.00 • Item #62472

## Study Guide to Substance Abuse Treatment

*A Companion to The American Psychiatric Publishing Textbook of Substance Abuse Treatment, Fifth Edition*

Philip R. Muskin, M.D.

This book is a question-and-answer companion that allows you to evaluate your mastery of the subject matter as you progress through *The American Psychiatric Publishing Textbook of Substance Abuse Treatment*, Fifth Edition. The *Study Guide* is made up of questions divided into individual quizzes of 10–20 questions each that correspond to the chapters in the *Textbook*. Each answer is accompanied by a discussion that addresses the correct response.

2016 • 475 pages • ISBN 978-1-58562-511-6 • Paperback • \$59.00 • Item #62511

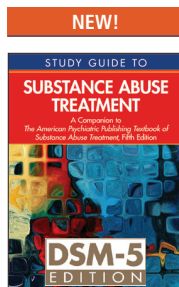

## The Behavioral Addictions

Edited by Michael S. Ascher, M.D., and Petros Levounis, M.D., M.A.

*The Behavioral Addictions* provides a pragmatic and engaging guide to help clinicians understand and contextualize conditions that may not be clearly delineated in the DSM-5 diagnostic system. Although not accorded a specific classification, the behaviors addressed in this book share the accepted hallmarks of addiction—continued engagement in an action despite negative consequences and loss of control over one's own life. The editors begin with an overview of the behavioral addictions and then present 12 case studies focused on a variety of behaviors.

2015 • 235 pages • ISBN 978-1-58562-485-0 • Paperback • \$62.00 • Item #62485

Video Illustrated

NEW!

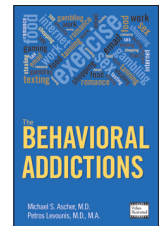

## Clinical Manual of Addiction Psychopharmacology, Second Edition

Edited by Henry R. Kranzler, M.D., Domenic A. Ciraulo, M.D., and Leah R. Zindel, R.Ph., M.A.L.S.

This new edition offers current information on the pharmacology of the major classes of drugs related to addiction, as well as the latest pharmacological treatment of dependence on these drugs. Advances have been made in the treatment of opioid, alcohol, and in particular tobacco dependence; and these chapters have been thoroughly updated accordingly. Prescribing clinicians, and other mental health practitioners will find this book invaluable in their work with individuals with substance-related disorders.

2014 • 463 pages • ISBN 978-1-58562-440-9 • Paperback • \$78.00 • Item #62440

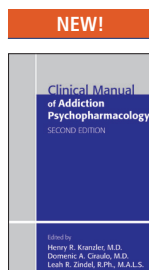

## The Addiction Casebook

Edited by Petros Levounis, M.D., M.A., and Abigail J. Herron, D.O.

The book consists of 13 clinical cases that exemplify DSM-5 addiction diagnoses commonly encountered in clinical practice. It lays out realistic and effective strategies to diagnose and treat patients with addictions ranging from alcohol and caffeine to gambling and problematic Internet use and includes multiple-answer questions at the end of each chapter designed to strengthen readers' knowledge. The contemporary, topical suggestions found in *The Addiction Casebook* will be useful to general psychiatrists, medical students, and allied professionals alike.

2014 • 230 pages • ISBN 978-1-58562-458-4 • Paperback • \$68.00 • Item #62458

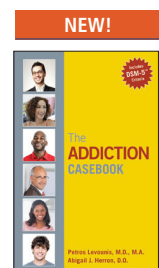

AMERICAN  
PSYCHIATRIC  
ASSOCIATION  
PUBLISHING

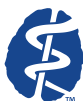

[www.appi.org](http://www.appi.org)

Email: [appi@psych.org](mailto:appi@psych.org)

Toll Free: 1-800-368-5777

20% Discount for American Psychiatric Association Members

25% Discount for APA Resident-Fellow Members

Please use Priority Code AH1503 when ordering.
